# Supplementary material
Source: ML conference proceedings conference paper supplement (https://aclanthology.org/2023.findings-eacl.103)
Supplement: dataset [file EACL_validation_results.xlsx]

## Sheet: LSTM_VTE
Training set	Val_accuracy	Val_loss	Learning rate	Epoch
𝒯	0.9062	0.2316	0.00009	9		Note: Validation accuracy, validation loss, learning rate and the epoch for the 5 best models for each training set used to create bootstrapped results.
𝒯	0.9062	0.2382	0.00009	9
𝒯	0.9075	0.2390	0.00008	9
𝒯	0.9150	0.2347	0.00009	9
𝒯	0.9062	0.2386	0.0001	8
𝒯⊄_lower-extrimity	0.7337	0.5277	0.00009	2
𝒯⊄_lower-extrimity	0.6963	0.5555	0.00008	2
𝒯⊄_lower-extrimity	0.7175	0.5299	0.0001	2
𝒯⊄_lower-extrimity	0.7250	0.5338	0.00008	2
𝒯⊄_lower-extrimity	0.7150	0.5318	0.00009	2
𝒯⊄_lung	0.7013	0.5265	0.00008	2
𝒯⊄_lung	0.7000	0.5245	0.00009	2
𝒯⊄_lung	0.6900	0.5344	0.00008	2
𝒯⊄_lung	0.7050	0.5211	0.00008	2
𝒯⊄_lung	0.7100	0.5144	0.00009	2

## Sheet: LSTM_bleeding
Training set	Val_accuracy	Val_loss	Learning rate	Epoch
𝒯⊄_cerebral	0.9047	0.2549	0.00009	16		Note: Validation accuracy, validation loss, learning rate and the epoch for the 5 best models for each training set used to create bootstrapped results.
𝒯⊄_cerebral	0.8992	0.2549	0.00008	14
𝒯⊄_cerebral	0.9003	0.2561	0.00009	14
𝒯⊄_cerebral	0.9013	0.2545	0.00008	16
𝒯⊄_cerebral	0.8982	0.2567	0.0001	8
𝒯⊄_gynecological	0.8965	0.2661	0.0001	14
𝒯⊄_gynecological	0.8997	0.2563	0.00009	18
𝒯⊄_gynecological	0.8980	0.2571	0.0001	12
𝒯⊄_gynecological	0.8965	0.2650	0.00009	15
𝒯⊄_gynecological	0.8967	0.2671	0.00009	18
𝒯⊄_Dermatological	0.8888	0.2818	0.00008	10
𝒯⊄_Dermatological	0.8870	0.2879	0.00007	12
𝒯⊄_Dermatological	0.8835	0.2802	0.00009	14
𝒯⊄_Dermatological	0.8840	0.2807	0.0001	9
𝒯⊄_Dermatological	0.8875	0.2782	0.0001	14
𝒯⊄_Internal	0.8975	0.2618	0.0001	10
𝒯⊄_Internal	0.8963	0.2581	0.00009	12
𝒯⊄_Internal	0.8920	0.2624	0.0001	8
𝒯⊄_Internal	0.8947	0.2631	0.0001	9
𝒯⊄_Internal	0.8970	0.2566	0.00009	15
𝒯⊄_Gastrointestinal	0.8820	0.2792	0.00007	5
𝒯⊄_Gastrointestinal	0.8938	0.2738	0.00009	15
𝒯⊄_Gastrointestinal	0.8890	0.2809	0.0001	13
𝒯⊄_Gastrointestinal	0.8845	0.2802	0.0001	6
𝒯⊄_Gastrointestinal	0.8967	0.2783	0.0001	16
𝒯	0.9043	0.2357	0.0001	16
𝒯	0.9112	0.2328	0.00009	16
𝒯	0.9065	0.2395	0.0001	17
𝒯	0.9120	0.2363	0.00009	20
𝒯	0.9075	0.2393	0.00007	15
𝒯⊄_Urogenital	0.8895	0.2786	0.00008	11
𝒯⊄_Urogenital	0.8890	0.2798	0.0001	9
𝒯⊄_Urogenital	0.8882	0.2746	0.00007	10
𝒯⊄_Urogenital	0.8848	0.2709	0.0001	13
𝒯⊄_Urogenital	0.8907	0.2752	0.00007	17
𝒯⊄_Ophthalmological	0.8928	0.2757	0.00007	16
𝒯⊄_Ophthalmological	0.8830	0.2818	0.00008	11
𝒯⊄_Ophthalmological	0.8863	0.2773	0.00009	12
𝒯⊄_Ophthalmological	0.8848	0.2826	0.00009	15
𝒯⊄_Ophthalmological	0.8945	0.2804	0.00008	17
𝒯⊄_Otorhinolaryngeal	0.9035	0.2460	0.00008	15
𝒯⊄_Otorhinolaryngeal	0.9095	0.2430	0.0001	15
𝒯⊄_Otorhinolaryngeal	0.9040	0.2456	0.0001	13
𝒯⊄_Otorhinolaryngeal	0.9030	0.2445	0.00007	17
𝒯⊄_Otorhinolaryngeal	0.8980	0.2491	0.0001	9

## Sheet: ELECTRA_VTE
Training set	Val_accuracy	Val_loss	Learning rate	Epoch
𝒯⊄_lower-extrimity	0.7237	0.5778	7e-05	4		Note: Validation accuracy, validation loss, learning rate and the epoch for the 5 best models for each training set used to create bootstrapped results.
𝒯⊄_lower-extrimity	0.7325	0.5800	8e-05	4
𝒯⊄_lower-extrimity	0.7250	0.5832	7e-05	4
𝒯⊄_lower-extrimity	0.7300	0.5825	7e-05	5
𝒯⊄_lower-extrimity	0.7163	0.5875	9e-05	4
𝒯⊄_lung	0.7688	0.5320	0.0001	4
𝒯⊄_lung	0.7475	0.5770	8e-05	5
𝒯⊄_lung	0.7387	0.5691	7e-05	5
𝒯⊄_lung	0.7237	0.5769	7e-05	4
𝒯⊄_lung	0.7475	0.5481	8e-05	4
𝒯	0.9750	0.1037	7e-05	13
𝒯	0.9638	0.1229	9e-05	8
𝒯	0.9688	0.1158	0.0001	8
𝒯	0.9688	0.1137	7e-05	12
𝒯	0.9712	0.1063	8e-05	12

## Sheet: ELECTRA_bleeding
Training set	Val_accuracy	Val_loss	Learning rate	Epoch
𝒯⊄_cerebral	0.9420	0.1701	0.00008	3		Note: Validation accuracy, validation loss, learning rate and the epoch for the 5 best models for each training set used to create bootstrapped results.
𝒯⊄_cerebral	0.9442	0.1626	0.00008	5
𝒯⊄_cerebral	0.9413	0.1661	0.00008	4
𝒯⊄_cerebral	0.9455	0.1627	0.0001	4
𝒯⊄_cerebral	0.9492	0.1569	0.00008	5
𝒯⊄_gynecological	0.9342	0.1823	0.00009	4
𝒯⊄_gynecological	0.9390	0.1816	0.00007	5
𝒯⊄_gynecological	0.9427	0.1785	0.00009	6
𝒯⊄_gynecological	0.9410	0.1736	0.0001	4
𝒯⊄_gynecological	0.9420	0.1855	0.0001	4
𝒯⊄_Dermatological	0.9438	0.1644	0.00007	6
𝒯⊄_Dermatological	0.9423	0.1599	0.00008	6
𝒯⊄_Dermatological	0.9445	0.1668	0.0001	4
𝒯⊄_Dermatological	0.9485	0.1676	0.0001	6
𝒯⊄_Dermatological	0.9425	0.1553	0.00007	5
𝒯⊄_Internal	0.9463	0.1524	0.0001	4
𝒯⊄_Internal	0.9475	0.1589	0.00009	5
𝒯⊄_Internal	0.9440	0.1519	0.00009	5
𝒯⊄_Internal	0.9488	0.1592	0.0001	4
𝒯⊄_Internal	0.9523	0.1572	0.00007	7
𝒯⊄_Gastrointestinal	0.9460	0.1765	0.0001	5
𝒯⊄_Gastrointestinal	0.9395	0.1648	0.0001	3
𝒯⊄_Gastrointestinal	0.9427	0.1758	0.00008	4
𝒯⊄_Gastrointestinal	0.9495	0.1625	0.00007	5
𝒯⊄_Gastrointestinal	0.9362	0.1841	0.00008	3
𝒯⊄_Urogenital	0.9420	0.1789	0.00007	5
𝒯⊄_Urogenital	0.9367	0.2005	0.00007	6
𝒯⊄_Urogenital	0.9367	0.1806	0.0001	4
𝒯⊄_Urogenital	0.9400	0.1828	0.0001	4
𝒯⊄_Urogenital	0.9367	0.1829	0.0001	3
𝒯⊄_Ophthalmological	0.9505	0.1376	0.00007	5
𝒯⊄_Ophthalmological	0.9525	0.1393	0.0001	4
𝒯⊄_Ophthalmological	0.9510	0.1404	0.00007	5
𝒯⊄_Ophthalmological	0.9538	0.1384	0.0001	3
𝒯⊄_Ophthalmological	0.9498	0.1374	0.0001	4
𝒯⊄_Otorhinolaryngeal	0.9550	0.1342	0.00008	4
𝒯⊄_Otorhinolaryngeal	0.9553	0.1349	0.00008	4
𝒯⊄_Otorhinolaryngeal	0.9538	0.1293	0.00009	4
𝒯⊄_Otorhinolaryngeal	0.9585	0.1301	0.00007	7
𝒯⊄_Otorhinolaryngeal	0.9542	0.1344	0.0001	7
𝒯	0.9585	0.1242	0.00008	7
𝒯	0.9572	0.1256	0.00009	5
𝒯	0.9515	0.1304	0.00007	5
𝒯	0.9585	0.1275	0.00009	4
𝒯	0.9500	0.1323	0.0001	4

## Sheet: LSTM_VTE_xxpercentage
Training set	Val_accuracy	Val_loss	Learning rate	Epoch	% of subgroup samples
𝒯⊄_lower-extrimity	0.7125	0.5375	0.00009	2	1		Note: Validation accuracy, validation loss, learning rate and the epoch for the 5 best models for each training set used to create bootstrapped results. % subgroup samples are the % of samples with a specific location kept in the training set
𝒯⊄_lower-extrimity	0.8025	0.4673	0.0001	10	1
𝒯⊄_lower-extrimity	0.7788	0.5152	0.0001	7	1
𝒯⊄_lower-extrimity	0.7763	0.5074	0.0001	7	1
𝒯⊄_lower-extrimity	0.7950	0.5049	0.00009	10	1
𝒯⊄_lung	0.7038	0.5159	0.00008	2	1
𝒯⊄_lung	0.7025	0.5155	0.0001	2	1
𝒯⊄_lung	0.7050	0.5132	0.00009	2	1
𝒯⊄_lung	0.7075	0.4995	0.00009	2	1
𝒯⊄_lung	0.7150	0.4980	0.0001	2	1
𝒯⊄_lower-extrimity	0.9013	0.2601	0.0001	8	15
𝒯⊄_lower-extrimity	0.9025	0.2615	0.0001	9	15
𝒯⊄_lower-extrimity	0.8950	0.2663	0.00008	10	15
𝒯⊄_lower-extrimity	0.8938	0.2672	0.00009	8	15
𝒯⊄_lower-extrimity	0.8950	0.2635	0.00008	9	15
𝒯⊄_lung	0.8875	0.2897	0.00009	10	15
𝒯⊄_lung	0.8850	0.2938	0.0001	9	15
𝒯⊄_lung	0.8838	0.2884	0.0001	8	15
𝒯⊄_lung	0.8900	0.2881	0.0001	9	15
𝒯⊄_lung	0.8888	0.2888	0.00008	9	15
𝒯⊄_lower-extrimity	0.9087	0.2388	0.0001	13	30
𝒯⊄_lower-extrimity	0.9112	0.2460	0.0001	7	30
𝒯⊄_lower-extrimity	0.9137	0.2407	0.00009	9	30
𝒯⊄_lower-extrimity	0.9112	0.2362	0.00008	12	30
𝒯⊄_lower-extrimity	0.9038	0.2411	0.0001	6	30
𝒯⊄_lung	0.9050	0.2461	0.00009	10	30
𝒯⊄_lung	0.9000	0.2540	0.0001	8	30
𝒯⊄_lung	0.9050	0.2566	0.00009	7	30
𝒯⊄_lung	0.9075	0.2501	0.0001	9	30
𝒯⊄_lung	0.9112	0.2452	0.00009	9	30
𝒯⊄_lower-extrimity	0.9150	0.2220	0.00009	11	60
𝒯⊄_lower-extrimity	0.9125	0.2233	0.00009	10	60
𝒯⊄_lower-extrimity	0.9162	0.2262	0.00009	7	60
𝒯⊄_lower-extrimity	0.9162	0.2253	0.00009	9	60
𝒯⊄_lower-extrimity	0.9125	0.2260	0.00009	7	60
𝒯⊄_lung	0.9125	0.2221	0.0001	8	60
𝒯⊄_lung	0.9125	0.2236	0.00008	8	60
𝒯⊄_lung	0.9087	0.2279	0.0001	10	60
𝒯⊄_lung	0.9112	0.2238	0.00008	8	60
𝒯⊄_lung	0.9038	0.2264	0.0001	8	60
𝒯⊄_lower-extrimity	0.9162	0.2117	0.0001	15	80
𝒯⊄_lower-extrimity	0.9225	0.2143	0.00008	18	80
𝒯⊄_lower-extrimity	0.9112	0.2093	0.00009	15	80
𝒯⊄_lower-extrimity	0.9137	0.2106	0.0001	13	80
𝒯⊄_lower-extrimity	0.9200	0.2163	0.0001	8	80
𝒯⊄_lung	0.9137	0.2092	0.0001	13	80
𝒯⊄_lung	0.9150	0.2171	0.0001	7	80
𝒯⊄_lung	0.9100	0.2142	0.00007	10	80
𝒯⊄_lung	0.9187	0.2154	0.0001	9	80
𝒯⊄_lung	0.9137	0.2135	0.00008	11	80

## Sheet: LSTM_bleeding_xxpercentage
Training set	Val_accuracy	Val_loss	Learning rate	Epoch	% of subgroup samples
𝒯⊄_cerebral	0.9003	0.2481	0.0001	10	1		Note: Validation accuracy, validation loss, learning rate and the epoch for the 5 best models for each training set used to create bootstrapped results. % subgroup samples are the % of samples with a specific location kept in the training set
𝒯⊄_cerebral	0.9050	0.2490	0.00009	14	1
𝒯⊄_cerebral	0.8988	0.2522	0.00007	17	1
𝒯⊄_cerebral	0.8992	0.2532	0.0001	10	1
𝒯⊄_cerebral	0.9025	0.2554	0.00008	14	1
𝒯⊄_gynecological	0.8923	0.2645	0.00009	11	1
𝒯⊄_gynecological	0.8915	0.2643	0.0001	10	1
𝒯⊄_gynecological	0.8923	0.2673	0.00009	11	1
𝒯⊄_gynecological	0.8882	0.2642	0.0001	6	1
𝒯⊄_gynecological	0.8972	0.2556	0.00007	14	1
𝒯⊄_Dermatological	0.8903	0.2769	0.00007	12	1
𝒯⊄_Dermatological	0.8880	0.2772	0.00009	11	1
𝒯⊄_Dermatological	0.8882	0.2796	0.00008	10	1
𝒯⊄_Dermatological	0.8890	0.2748	0.00009	14	1
𝒯⊄_Dermatological	0.8923	0.2769	0.0001	13	1
𝒯⊄_Internal	0.8957	0.2602	0.00009	9	1
𝒯⊄_Internal	0.9015	0.2552	0.00009	15	1
𝒯⊄_Internal	0.8995	0.2551	0.0001	16	1
𝒯⊄_Internal	0.9000	0.2603	0.00008	13	1
𝒯⊄_Internal	0.8970	0.2623	0.00008	11	1
𝒯⊄_Gastrointestinal	0.8892	0.2796	0.0001	7	1
𝒯⊄_Gastrointestinal	0.8852	0.2820	0.00008	6	1
𝒯⊄_Gastrointestinal	0.8880	0.2797	0.00007	10	1
𝒯⊄_Gastrointestinal	0.8860	0.2812	0.00007	11	1
𝒯⊄_Gastrointestinal	0.8942	0.2788	0.00009	12	1
𝒯⊄_Urogenital	0.8888	0.2721	0.00009	10	1
𝒯⊄_Urogenital	0.8920	0.2722	0.00009	14	1
𝒯⊄_Urogenital	0.8925	0.2742	0.00007	14	1
𝒯⊄_Urogenital	0.8907	0.2699	0.0001	10	1
𝒯⊄_Urogenital	0.8888	0.2769	0.00008	13	1
𝒯⊄_Ophthalmological	0.8985	0.2681	0.0001	13	1
𝒯⊄_Ophthalmological	0.8890	0.2632	0.00007	16	1
𝒯⊄_Ophthalmological	0.8867	0.2782	0.00007	11	1
𝒯⊄_Ophthalmological	0.8870	0.2752	0.00009	9	1
𝒯⊄_Ophthalmological	0.8915	0.2666	0.00008	16	1
𝒯⊄_Otorhinolaryngeal	0.9035	0.2470	0.0001	10	1
𝒯⊄_Otorhinolaryngeal	0.9040	0.2449	0.00009	11	1
𝒯⊄_Otorhinolaryngeal	0.9020	0.2464	0.00007	10	1
𝒯⊄_Otorhinolaryngeal	0.9030	0.2392	0.00009	14	1
𝒯⊄_Otorhinolaryngeal	0.9018	0.2450	0.00007	15	1
𝒯⊄_cerebral	0.9068	0.2435	0.00008	12	15
𝒯⊄_cerebral	0.9062	0.2452	0.00008	12	15
𝒯⊄_cerebral	0.9085	0.2353	0.0001	12	15
𝒯⊄_cerebral	0.9060	0.2415	0.0001	10	15
𝒯⊄_cerebral	0.9050	0.2437	0.00008	11	15
𝒯⊄_gynecological	0.9018	0.2452	0.0001	8	15
𝒯⊄_gynecological	0.9062	0.2462	0.00009	11	15
𝒯⊄_gynecological	0.9038	0.2458	0.00009	10	15
𝒯⊄_gynecological	0.9025	0.2487	0.00008	10	15
𝒯⊄_gynecological	0.9028	0.2467	0.00008	11	15
𝒯⊄_Dermatological	0.9055	0.2513	0.00008	13	15
𝒯⊄_Dermatological	0.8990	0.2521	0.00008	11	15
𝒯⊄_Dermatological	0.9003	0.2517	0.0001	10	15
𝒯⊄_Dermatological	0.9000	0.2418	0.0001	11	15
𝒯⊄_Dermatological	0.9060	0.2492	0.00009	15	15
𝒯⊄_Internal	0.9013	0.2476	0.00008	12	15
𝒯⊄_Internal	0.9115	0.2405	0.00007	20	15
𝒯⊄_Internal	0.9060	0.2460	0.00009	10	15
𝒯⊄_Internal	0.9082	0.2411	0.0001	11	15
𝒯⊄_Internal	0.9018	0.2482	0.0001	10	15
𝒯⊄_Gastrointestinal	0.8988	0.2625	0.00009	11	15
𝒯⊄_Gastrointestinal	0.8942	0.2593	0.00008	9	15
𝒯⊄_Gastrointestinal	0.8950	0.2577	0.00009	9	15
𝒯⊄_Gastrointestinal	0.8953	0.2581	0.00009	7	15
𝒯⊄_Gastrointestinal	0.8942	0.2601	0.0001	8	15
𝒯⊄_Urogenital	0.9038	0.2431	0.00009	13	15
𝒯⊄_Urogenital	0.9032	0.2451	0.00009	12	15
𝒯⊄_Urogenital	0.9020	0.2409	0.00009	13	15
𝒯⊄_Urogenital	0.9022	0.2439	0.00009	11	15
𝒯⊄_Urogenital	0.9035	0.2363	0.0001	11	15
𝒯⊄_Ophthalmological	0.9125	0.2376	0.00009	14	15
𝒯⊄_Ophthalmological	0.9120	0.2331	0.0001	12	15
𝒯⊄_Ophthalmological	0.9078	0.2369	0.0001	12	15
𝒯⊄_Ophthalmological	0.9137	0.2383	0.00009	15	15
𝒯⊄_Ophthalmological	0.9030	0.2394	0.00009	9	15
𝒯⊄_Otorhinolaryngeal	0.9105	0.2379	0.00009	11	15
𝒯⊄_Otorhinolaryngeal	0.9057	0.2369	0.00009	11	15
𝒯⊄_Otorhinolaryngeal	0.9028	0.2400	0.00008	12	15
𝒯⊄_Otorhinolaryngeal	0.9090	0.2355	0.0001	12	15
𝒯⊄_Otorhinolaryngeal	0.9060	0.2431	0.00008	11	15
𝒯⊄_cerebral	0.9065	0.2378	0.00007	12	30
𝒯⊄_cerebral	0.9070	0.2393	0.0001	10	30
𝒯⊄_cerebral	0.9100	0.2373	0.00009	15	30
𝒯⊄_cerebral	0.9040	0.2411	0.00009	10	30
𝒯⊄_cerebral	0.9097	0.2342	0.00007	16	30
𝒯⊄_gynecological	0.9070	0.2401	0.0001	14	30
𝒯⊄_gynecological	0.9065	0.2409	0.0001	11	30
𝒯⊄_gynecological	0.9147	0.2357	0.0001	17	30
𝒯⊄_gynecological	0.9087	0.2393	0.0001	14	30
𝒯⊄_gynecological	0.9097	0.2387	0.00007	16	30
𝒯⊄_Dermatological	0.9115	0.2387	0.0001	11	30
𝒯⊄_Dermatological	0.9032	0.2430	0.0001	10	30
𝒯⊄_Dermatological	0.9112	0.2373	0.00008	17	30
𝒯⊄_Dermatological	0.9015	0.2427	0.00008	12	30
𝒯⊄_Dermatological	0.9078	0.2417	0.0001	10	30
𝒯⊄_Internal	0.9030	0.2383	0.00009	11	30
𝒯⊄_Internal	0.9060	0.2416	0.00009	13	30
𝒯⊄_Internal	0.9032	0.2395	0.0001	10	30
𝒯⊄_Internal	0.9028	0.2390	0.00007	11	30
𝒯⊄_Internal	0.9080	0.2396	0.00008	12	30
𝒯⊄_Gastrointestinal	0.9055	0.2470	0.0001	11	30
𝒯⊄_Gastrointestinal	0.9022	0.2481	0.00009	11	30
𝒯⊄_Gastrointestinal	0.9070	0.2492	0.00008	11	30
𝒯⊄_Gastrointestinal	0.9045	0.2461	0.0001	10	30
𝒯⊄_Gastrointestinal	0.9035	0.2430	0.0001	12	30
𝒯⊄_Urogenital	0.9055	0.2374	0.00009	11	30
𝒯⊄_Urogenital	0.9068	0.2363	0.0001	10	30
𝒯⊄_Urogenital	0.9040	0.2414	0.0001	9	30
𝒯⊄_Urogenital	0.9070	0.2399	0.00007	13	30
𝒯⊄_Urogenital	0.9110	0.2356	0.0001	12	30
𝒯⊄_Ophthalmological	0.9103	0.2331	0.0001	13	30
𝒯⊄_Ophthalmological	0.9090	0.2367	0.0001	12	30
𝒯⊄_Ophthalmological	0.9060	0.2339	0.00008	12	30
𝒯⊄_Ophthalmological	0.9072	0.2341	0.00008	12	30
𝒯⊄_Ophthalmological	0.9107	0.2353	0.0001	9	30
𝒯⊄_Otorhinolaryngeal	0.9100	0.2381	0.00009	12	30
𝒯⊄_Otorhinolaryngeal	0.9040	0.2377	0.00008	10	30
𝒯⊄_Otorhinolaryngeal	0.9087	0.2354	0.0001	9	30
𝒯⊄_Otorhinolaryngeal	0.9080	0.2397	0.00009	11	30
𝒯⊄_Otorhinolaryngeal	0.9118	0.2304	0.00008	18	30
𝒯⊄_cerebral	0.9065	0.2338	0.00008	11	60
𝒯⊄_cerebral	0.9095	0.2349	0.00009	11	60
𝒯⊄_cerebral	0.9035	0.2350	0.0001	11	60
𝒯⊄_cerebral	0.9100	0.2317	0.0001	14	60
𝒯⊄_cerebral	0.9050	0.2344	0.00008	13	60
𝒯⊄_gynecological	0.9075	0.2336	0.00009	10	60
𝒯⊄_gynecological	0.9087	0.2370	0.00008	12	60
𝒯⊄_gynecological	0.9093	0.2348	0.00008	16	60
𝒯⊄_gynecological	0.9068	0.2329	0.00007	13	60
𝒯⊄_gynecological	0.9093	0.2343	0.00009	13	60
𝒯⊄_Dermatological	0.9107	0.2321	0.00008	13	60
𝒯⊄_Dermatological	0.9097	0.2372	0.00009	11	60
𝒯⊄_Dermatological	0.9103	0.2370	0.00008	12	60
𝒯⊄_Dermatological	0.9135	0.2304	0.00008	18	60
𝒯⊄_Dermatological	0.9068	0.2359	0.00009	14	60
𝒯⊄_Internal	0.9100	0.2318	0.00009	16	60
𝒯⊄_Internal	0.9093	0.2342	0.0001	11	60
𝒯⊄_Internal	0.9090	0.2338	0.0001	13	60
𝒯⊄_Internal	0.9070	0.2347	0.00009	10	60
𝒯⊄_Internal	0.9095	0.2350	0.0001	10	60
𝒯⊄_Gastrointestinal	0.9078	0.2372	0.0001	9	60
𝒯⊄_Gastrointestinal	0.9090	0.2395	0.0001	11	60
𝒯⊄_Gastrointestinal	0.9135	0.2389	0.00009	15	60
𝒯⊄_Gastrointestinal	0.9115	0.2352	0.0001	14	60
𝒯⊄_Gastrointestinal	0.9035	0.2381	0.00008	11	60
𝒯⊄_Urogenital	0.9062	0.2353	0.00009	10	60
𝒯⊄_Urogenital	0.9075	0.2323	0.0001	9	60
𝒯⊄_Urogenital	0.9105	0.2370	0.00009	13	60
𝒯⊄_Urogenital	0.9118	0.2271	0.00008	16	60
𝒯⊄_Urogenital	0.9120	0.2326	0.0001	12	60
𝒯⊄_Ophthalmological	0.9112	0.2350	0.0001	12	60
𝒯⊄_Ophthalmological	0.9087	0.2343	0.00009	11	60
𝒯⊄_Ophthalmological	0.9095	0.2306	0.00008	15	60
𝒯⊄_Ophthalmological	0.9078	0.2345	0.00009	10	60
𝒯⊄_Ophthalmological	0.9145	0.2300	0.00009	14	60
𝒯⊄_Otorhinolaryngeal	0.9118	0.2350	0.0001	11	60
𝒯⊄_Otorhinolaryngeal	0.9070	0.2329	0.00008	14	60
𝒯⊄_Otorhinolaryngeal	0.9112	0.2325	0.0001	10	60
𝒯⊄_Otorhinolaryngeal	0.9097	0.2314	0.00009	12	60
𝒯⊄_Otorhinolaryngeal	0.9072	0.2345	0.00009	10	60
𝒯⊄_cerebral	0.9087	0.2272	0.00008	17	80
𝒯⊄_cerebral	0.9105	0.2279	0.00009	11	80
𝒯⊄_cerebral	0.9087	0.2273	0.0001	12	80
𝒯⊄_cerebral	0.9112	0.2289	0.0001	10	80
𝒯⊄_cerebral	0.9145	0.2229	0.00009	15	80
𝒯⊄_gynecological	0.9130	0.2318	0.0001	12	80
𝒯⊄_gynecological	0.9110	0.2301	0.00007	13	80
𝒯⊄_gynecological	0.9107	0.2312	0.00008	15	80
𝒯⊄_gynecological	0.9080	0.2274	0.0001	10	80
𝒯⊄_gynecological	0.9103	0.2314	0.0001	12	80
𝒯⊄_Dermatological	0.9135	0.2208	0.00009	14	80
𝒯⊄_Dermatological	0.9090	0.2322	0.00008	15	80
𝒯⊄_Dermatological	0.9128	0.2293	0.00009	10	80
𝒯⊄_Dermatological	0.9128	0.2262	0.0001	12	80
𝒯⊄_Dermatological	0.9155	0.2323	0.00009	15	80
𝒯⊄_Internal	0.9110	0.2322	0.00008	14	80
𝒯⊄_Internal	0.9080	0.2332	0.00009	10	80
𝒯⊄_Internal	0.9082	0.2274	0.00009	14	80
𝒯⊄_Internal	0.9050	0.2336	0.00007	12	80
𝒯⊄_Internal	0.9107	0.2320	0.0001	10	80
𝒯⊄_Gastrointestinal	0.9065	0.2355	0.0001	10	80
𝒯⊄_Gastrointestinal	0.9035	0.2334	0.00007	13	80
𝒯⊄_Gastrointestinal	0.9093	0.2342	0.00009	10	80
𝒯⊄_Gastrointestinal	0.9110	0.2295	0.00007	18	80
𝒯⊄_Gastrointestinal	0.9150	0.2293	0.00009	14	80
𝒯⊄_Urogenital	0.9095	0.2310	0.00007	16	80
𝒯⊄_Urogenital	0.9118	0.2301	0.0001	11	80
𝒯⊄_Urogenital	0.9137	0.2314	0.00007	13	80
𝒯⊄_Urogenital	0.9100	0.2306	0.00007	15	80
𝒯⊄_Urogenital	0.9140	0.2235	0.00009	13	80
𝒯⊄_Ophthalmological	0.9122	0.2247	0.0001	14	80
𝒯⊄_Ophthalmological	0.9110	0.2305	0.00009	13	80
𝒯⊄_Ophthalmological	0.9122	0.2239	0.0001	10	80
𝒯⊄_Ophthalmological	0.9120	0.2282	0.00008	12	80
𝒯⊄_Ophthalmological	0.9065	0.2276	0.00008	11	80
𝒯⊄_Otorhinolaryngeal	0.9075	0.2345	0.00007	13	80
𝒯⊄_Otorhinolaryngeal	0.9097	0.2315	0.0001	11	80
𝒯⊄_Otorhinolaryngeal	0.9105	0.2342	0.00008	13	80
𝒯⊄_Otorhinolaryngeal	0.9110	0.2278	0.0001	11	80
𝒯⊄_Otorhinolaryngeal	0.9133	0.2306	0.00009	15	80

## Sheet: ELECTRA_bleeding_xxpercentage
Training set	Val_accuracy	Val_loss	Learning rate	Epoch	% of subgroup samples
𝒯⊄_cerebral	0.9490	0.1592	0.00007	5	1		Note: Validation accuracy, validation loss, learning rate and the epoch for the 5 best models for each training set used to create bootstrapped results. % subgroup samples are the % of samples with a specific location kept in the training set
𝒯⊄_cerebral	0.9492	0.1622	0.00009	5	1
𝒯⊄_cerebral	0.9465	0.1638	0.00009	4	1
𝒯⊄_cerebral	0.9477	0.1565	0.00009	4	1
𝒯⊄_cerebral	0.9445	0.1633	0.00007	5	1
𝒯⊄_gynecological	0.9433	0.1830	0.00008	5	1
𝒯⊄_gynecological	0.9413	0.1881	0.00007	6	1
𝒯⊄_gynecological	0.9400	0.1734	0.00007	5	1
𝒯⊄_gynecological	0.9402	0.1818	0.00008	4	1
𝒯⊄_gynecological	0.9395	0.1894	0.00007	6	1
𝒯⊄_Dermatological	0.9457	0.1563	0.00008	4	1
𝒯⊄_Dermatological	0.9490	0.1563	0.00009	4	1
𝒯⊄_Dermatological	0.9505	0.1646	0.00009	5	1
𝒯⊄_Dermatological	0.9503	0.1604	0.00007	5	1
𝒯⊄_Dermatological	0.9495	0.1516	0.00009	5	1
𝒯⊄_Internal	0.9490	0.1444	0.00009	4	1
𝒯⊄_Internal	0.9480	0.1361	0.00007	5	1
𝒯⊄_Internal	0.9532	0.1447	0.00008	8	1
𝒯⊄_Internal	0.9480	0.1493	0.00009	3	1
𝒯⊄_Internal	0.9475	0.1461	0.00009	4	1
𝒯⊄_Gastrointestinal	0.9420	0.1728	0.00007	5	1
𝒯⊄_Gastrointestinal	0.9442	0.1788	0.00009	5	1
𝒯⊄_Gastrointestinal	0.9435	0.1836	0.00009	5	1
𝒯⊄_Gastrointestinal	0.9410	0.1728	0.00007	5	1
𝒯⊄_Gastrointestinal	0.9433	0.1772	0.00009	5	1
𝒯⊄_Urogenital	0.9402	0.1705	0.00009	4	1
𝒯⊄_Urogenital	0.9385	0.1845	0.00007	5	1
𝒯⊄_Urogenital	0.9430	0.1720	0.00007	5	1
𝒯⊄_Urogenital	0.9427	0.1778	0.00007	5	1
𝒯⊄_Urogenital	0.9420	0.1713	0.00009	4	1
𝒯⊄_Ophthalmological	0.9545	0.1323	0.00009	5	1
𝒯⊄_Ophthalmological	0.9528	0.1361	0.00009	4	1
𝒯⊄_Ophthalmological	0.9477	0.1422	0.00007	5	1
𝒯⊄_Ophthalmological	0.9505	0.1378	0.00007	5	1
𝒯⊄_Ophthalmological	0.9513	0.1332	0.00008	5	1
𝒯⊄_Otorhinolaryngeal	0.9553	0.1360	0.00007	5	1
𝒯⊄_Otorhinolaryngeal	0.9565	0.1296	0.00009	5	1
𝒯⊄_Otorhinolaryngeal	0.9553	0.1303	0.00007	6	1
𝒯⊄_Otorhinolaryngeal	0.9555	0.1326	0.00009	5	1
𝒯⊄_Otorhinolaryngeal	0.9567	0.1364	0.00008	6	1
𝒯⊄_cerebral	0.9555	0.1398	0.00009	5	15
𝒯⊄_cerebral	0.9557	0.1321	0.00009	5	15
𝒯⊄_cerebral	0.9500	0.1410	0.00009	3	15
𝒯⊄_cerebral	0.9528	0.1450	0.00007	5	15
𝒯⊄_cerebral	0.9538	0.1413	0.00009	5	15
𝒯⊄_gynecological	0.9525	0.1414	0.00007	5	15
𝒯⊄_gynecological	0.9513	0.1388	0.00008	4	15
𝒯⊄_gynecological	0.9572	0.1332	0.00007	5	15
𝒯⊄_gynecological	0.9545	0.1372	0.00008	4	15
𝒯⊄_gynecological	0.9525	0.1380	0.00007	4	15
𝒯⊄_Dermatological	0.9530	0.1457	0.00008	7	15
𝒯⊄_Dermatological	0.9507	0.1354	0.00007	6	15
𝒯⊄_Dermatological	0.9507	0.1328	0.00007	5	15
𝒯⊄_Dermatological	0.9517	0.1370	0.00009	4	15
𝒯⊄_Dermatological	0.9540	0.1378	0.00009	4	15
𝒯⊄_Internal	0.9540	0.1340	0.00008	4	15
𝒯⊄_Internal	0.9517	0.1312	0.00008	4	15
𝒯⊄_Internal	0.9538	0.1284	0.00008	4	15
𝒯⊄_Internal	0.9553	0.1259	0.00007	6	15
𝒯⊄_Internal	0.9560	0.1210	0.00009	5	15
𝒯⊄_Gastrointestinal	0.9528	0.1476	0.00007	5	15
𝒯⊄_Gastrointestinal	0.9503	0.1460	0.00007	4	15
𝒯⊄_Gastrointestinal	0.9565	0.1372	0.00009	5	15
𝒯⊄_Gastrointestinal	0.9542	0.1432	0.00008	7	15
𝒯⊄_Gastrointestinal	0.9540	0.1381	0.00007	5	15
𝒯⊄_Urogenital	0.9528	0.1351	0.00009	4	15
𝒯⊄_Urogenital	0.9503	0.1376	0.00009	4	15
𝒯⊄_Urogenital	0.9540	0.1292	0.00009	5	15
𝒯⊄_Urogenital	0.9485	0.1398	0.00009	4	15
𝒯⊄_Urogenital	0.9592	0.1355	0.00008	6	15
𝒯⊄_Ophthalmological	0.9550	0.1236	0.00009	4	15
𝒯⊄_Ophthalmological	0.9572	0.1272	0.00007	5	15
𝒯⊄_Ophthalmological	0.9535	0.1351	0.00009	5	15
𝒯⊄_Ophthalmological	0.9532	0.1302	0.00009	4	15
𝒯⊄_Ophthalmological	0.9580	0.1283	0.00009	4	15
𝒯⊄_Otorhinolaryngeal	0.9535	0.1244	0.00009	4	15
𝒯⊄_Otorhinolaryngeal	0.9560	0.1307	0.00008	6	15
𝒯⊄_Otorhinolaryngeal	0.9542	0.1310	0.00007	5	15
𝒯⊄_Otorhinolaryngeal	0.9510	0.1322	0.00008	4	15
𝒯⊄_Otorhinolaryngeal	0.9565	0.1254	0.00008	6	15
𝒯⊄_cerebral	0.9570	0.1220	0.00008	5	30
𝒯⊄_cerebral	0.9548	0.1319	0.00009	5	30
𝒯⊄_cerebral	0.9545	0.1286	0.00008	5	30
𝒯⊄_cerebral	0.9550	0.1350	0.00007	5	30
𝒯⊄_cerebral	0.9572	0.1334	0.00009	6	30
𝒯⊄_gynecological	0.9557	0.1359	0.00007	5	30
𝒯⊄_gynecological	0.9550	0.1324	0.00009	4	30
𝒯⊄_gynecological	0.9595	0.1168	0.00007	6	30
𝒯⊄_gynecological	0.9560	0.1314	0.00009	5	30
𝒯⊄_gynecological	0.9572	0.1255	0.00009	5	30
𝒯⊄_Dermatological	0.9477	0.1391	0.00009	3	30
𝒯⊄_Dermatological	0.9578	0.1202	0.00009	5	30
𝒯⊄_Dermatological	0.9540	0.1370	0.00007	5	30
𝒯⊄_Dermatological	0.9570	0.1306	0.00009	6	30
𝒯⊄_Dermatological	0.9563	0.1329	0.00009	5	30
𝒯⊄_Internal	0.9567	0.1219	0.00009	6	30
𝒯⊄_Internal	0.9580	0.1268	0.00008	6	30
𝒯⊄_Internal	0.9555	0.1294	0.00008	5	30
𝒯⊄_Internal	0.9560	0.1293	0.00008	6	30
𝒯⊄_Internal	0.9588	0.1381	0.00009	5	30
𝒯⊄_Gastrointestinal	0.9540	0.1312	0.00008	5	30
𝒯⊄_Gastrointestinal	0.9578	0.1228	0.00007	6	30
𝒯⊄_Gastrointestinal	0.9563	0.1338	0.00009	5	30
𝒯⊄_Gastrointestinal	0.9540	0.1328	0.00008	5	30
𝒯⊄_Gastrointestinal	0.9542	0.1351	0.00008	4	30
𝒯⊄_Urogenital	0.9555	0.1256	0.00009	4	30
𝒯⊄_Urogenital	0.9590	0.1257	0.00009	4	30
𝒯⊄_Urogenital	0.9607	0.1271	0.00009	7	30
𝒯⊄_Urogenital	0.9530	0.1253	0.00009	5	30
𝒯⊄_Urogenital	0.9582	0.1302	0.00007	5	30
𝒯⊄_Ophthalmological	0.9557	0.1240	0.00008	4	30
𝒯⊄_Ophthalmological	0.9578	0.1225	0.00007	6	30
𝒯⊄_Ophthalmological	0.9560	0.1207	0.00009	5	30
𝒯⊄_Ophthalmological	0.9548	0.1269	0.00008	5	30
𝒯⊄_Ophthalmological	0.9545	0.1277	0.00007	5	30
𝒯⊄_Otorhinolaryngeal	0.9553	0.1241	0.00007	5	30
𝒯⊄_Otorhinolaryngeal	0.9550	0.1302	0.00008	5	30
𝒯⊄_Otorhinolaryngeal	0.9567	0.1283	0.00009	4	30
𝒯⊄_Otorhinolaryngeal	0.9530	0.1282	0.00009	5	30
𝒯⊄_Otorhinolaryngeal	0.9578	0.1215	0.00009	4	30
𝒯⊄_cerebral	0.9555	0.1274	0.00009	4	60
𝒯⊄_cerebral	0.9582	0.1291	0.00007	5	60
𝒯⊄_cerebral	0.9590	0.1243	0.00007	6	60
𝒯⊄_cerebral	0.9600	0.1299	0.00009	5	60
𝒯⊄_cerebral	0.9578	0.1297	0.00009	3	60
𝒯⊄_gynecological	0.9570	0.1244	0.00008	4	60
𝒯⊄_gynecological	0.9545	0.1269	0.00007	5	60
𝒯⊄_gynecological	0.9597	0.1198	0.00009	6	60
𝒯⊄_gynecological	0.9565	0.1240	0.00008	4	60
𝒯⊄_gynecological	0.9548	0.1286	0.00009	4	60
𝒯⊄_Dermatological	0.9595	0.1263	0.00008	5	60
𝒯⊄_Dermatological	0.9530	0.1314	0.00009	4	60
𝒯⊄_Dermatological	0.9530	0.1312	0.00009	5	60
𝒯⊄_Dermatological	0.9570	0.1281	0.00007	5	60
𝒯⊄_Dermatological	0.9580	0.1207	0.00009	4	60
𝒯⊄_Internal	0.9572	0.1272	0.00007	6	60
𝒯⊄_Internal	0.9540	0.1209	0.00009	4	60
𝒯⊄_Internal	0.9555	0.1255	0.00008	6	60
𝒯⊄_Internal	0.9572	0.1278	0.00009	4	60
𝒯⊄_Internal	0.9560	0.1309	0.00009	3	60
𝒯⊄_Gastrointestinal	0.9592	0.1374	0.00009	5	60
𝒯⊄_Gastrointestinal	0.9548	0.1285	0.00009	4	60
𝒯⊄_Gastrointestinal	0.9567	0.1260	0.00007	5	60
𝒯⊄_Gastrointestinal	0.9597	0.1321	0.00008	5	60
𝒯⊄_Gastrointestinal	0.9553	0.1309	0.00007	4	60
𝒯⊄_Urogenital	0.9572	0.1310	0.00009	4	60
𝒯⊄_Urogenital	0.9575	0.1260	0.00007	6	60
𝒯⊄_Urogenital	0.9580	0.1252	0.00008	4	60
𝒯⊄_Urogenital	0.9555	0.1248	0.00008	5	60
𝒯⊄_Urogenital	0.9585	0.1273	0.00009	5	60
𝒯⊄_Ophthalmological	0.9540	0.1319	0.00008	3	60
𝒯⊄_Ophthalmological	0.9592	0.1289	0.00009	6	60
𝒯⊄_Ophthalmological	0.9585	0.1209	0.00007	5	60
𝒯⊄_Ophthalmological	0.9560	0.1346	0.00007	6	60
𝒯⊄_Ophthalmological	0.9563	0.1233	0.00008	5	60
𝒯⊄_Otorhinolaryngeal	0.9567	0.1236	0.00009	4	60
𝒯⊄_Otorhinolaryngeal	0.9538	0.1375	0.00009	5	60
𝒯⊄_Otorhinolaryngeal	0.9520	0.1290	0.00008	4	60
𝒯⊄_Otorhinolaryngeal	0.9550	0.1314	0.00009	5	60
𝒯⊄_Otorhinolaryngeal	0.9580	0.1263	0.00008	6	60
𝒯⊄_cerebral	0.9567	0.1261	0.00007	4	80
𝒯⊄_cerebral	0.9582	0.1249	0.00008	4	80
𝒯⊄_cerebral	0.9582	0.1224	0.00008	6	80
𝒯⊄_cerebral	0.9528	0.1303	0.00008	3	80
𝒯⊄_cerebral	0.9578	0.1305	0.00009	4	80
𝒯⊄_gynecological	0.9580	0.1174	0.00009	4	80
𝒯⊄_gynecological	0.9580	0.1234	0.00007	6	80
𝒯⊄_gynecological	0.9572	0.1262	0.00008	4	80
𝒯⊄_gynecological	0.9590	0.1299	0.00009	4	80
𝒯⊄_gynecological	0.9542	0.1328	0.00007	4	80
𝒯⊄_Dermatological	0.9567	0.1229	0.00009	5	80
𝒯⊄_Dermatological	0.9575	0.1280	0.00007	6	80
𝒯⊄_Dermatological	0.9560	0.1245	0.00008	4	80
𝒯⊄_Dermatological	0.9535	0.1273	0.00008	4	80
𝒯⊄_Dermatological	0.9578	0.1254	0.00008	4	80
𝒯⊄_Internal	0.9535	0.1310	0.00007	5	80
𝒯⊄_Internal	0.9557	0.1364	0.00008	5	80
𝒯⊄_Internal	0.9550	0.1294	0.00009	5	80
𝒯⊄_Internal	0.9565	0.1303	0.00007	5	80
𝒯⊄_Internal	0.9578	0.1284	0.00008	3	80
𝒯⊄_Gastrointestinal	0.9578	0.1191	0.00007	5	80
𝒯⊄_Gastrointestinal	0.9538	0.1319	0.00007	5	80
𝒯⊄_Gastrointestinal	0.9590	0.1171	0.00009	4	80
𝒯⊄_Gastrointestinal	0.9575	0.1270	0.00007	5	80
𝒯⊄_Gastrointestinal	0.9540	0.1273	0.00009	4	80
𝒯⊄_Urogenital	0.9567	0.1223	0.00009	4	80
𝒯⊄_Urogenital	0.9578	0.1211	0.00009	4	80
𝒯⊄_Urogenital	0.9560	0.1350	0.00008	6	80
𝒯⊄_Urogenital	0.9575	0.1228	0.00009	4	80
𝒯⊄_Urogenital	0.9572	0.1233	0.00009	4	80
𝒯⊄_Ophthalmological	0.9553	0.1298	0.00007	4	80
𝒯⊄_Ophthalmological	0.9597	0.1188	0.00007	5	80
𝒯⊄_Ophthalmological	0.9572	0.1254	0.00007	6	80
𝒯⊄_Ophthalmological	0.9530	0.1348	0.00008	3	80
𝒯⊄_Ophthalmological	0.9560	0.1321	0.00008	6	80
𝒯⊄_Otorhinolaryngeal	0.9570	0.1228	0.00008	4	80
𝒯⊄_Otorhinolaryngeal	0.9553	0.1229	0.00009	5	80
𝒯⊄_Otorhinolaryngeal	0.9567	0.1266	0.00009	5	80
𝒯⊄_Otorhinolaryngeal	0.9572	0.1281	0.00008	5	80
𝒯⊄_Otorhinolaryngeal	0.9597	0.1135	0.00007	5	80

## Sheet: ELECTRA_VTE_xxpercentage
Training set	Val_accuracy	Val_loss	Learning rate	Epoch	% of subgroup samples
𝒯⊄_lower-extrimity	0.9312	0.2287	0.00008	11	1		Note: Validation accuracy, validation loss, learning rate and the epoch for the 5 best models for each training set used to create bootstrapped results. % subgroup samples are the % of samples with a specific location kept in the training set
𝒯⊄_lower-extrimity	0.8712	0.3249	0.00008	8	1
𝒯⊄_lower-extrimity	0.9300	0.2151	0.00008	11	1
𝒯⊄_lower-extrimity	0.9312	0.2128	0.00007	11	1
𝒯⊄_lower-extrimity	0.9287	0.2259	0.00007	11	1
𝒯⊄_lung	0.9050	0.3284	0.00007	10	1
𝒯⊄_lung	0.8913	0.3749	0.00009	9	1
𝒯⊄_lung	0.9025	0.3058	0.00007	9	1
𝒯⊄_lung	0.9175	0.2700	0.00009	10	1
𝒯⊄_lung	0.7800	0.5039	0.00009	4	1
𝒯⊄_lower-extrimity	0.9737	0.1007	0.00007	11	15
𝒯⊄_lower-extrimity	0.9638	0.1291	0.00007	12	15
𝒯⊄_lower-extrimity	0.9787	0.1035	0.00007	14	15
𝒯⊄_lower-extrimity	0.9613	0.1172	0.00009	9	15
𝒯⊄_lower-extrimity	0.9600	0.1234	0.00007	11	15
𝒯⊄_lung	0.9688	0.1258	0.00007	12	15
𝒯⊄_lung	0.9638	0.1286	0.00009	7	15
𝒯⊄_lung	0.9638	0.1250	0.00007	13	15
𝒯⊄_lung	0.9638	0.1206	0.00009	8	15
𝒯⊄_lung	0.9650	0.1218	0.00007	10	15
𝒯⊄_lower-extrimity	0.9688	0.1143	0.00009	11	30
𝒯⊄_lower-extrimity	0.9737	0.1086	0.00008	8	30
𝒯⊄_lower-extrimity	0.9625	0.1221	0.00009	8	30
𝒯⊄_lower-extrimity	0.9700	0.1136	0.00008	10	30
𝒯⊄_lower-extrimity	0.9663	0.1110	0.00008	8	30
𝒯⊄_lung	0.9688	0.1203	0.00009	8	30
𝒯⊄_lung	0.9737	0.1061	0.00007	11	30
𝒯⊄_lung	0.9737	0.1070	0.00008	8	30
𝒯⊄_lung	0.9663	0.1193	0.00009	7	30
𝒯⊄_lung	0.9688	0.0980	0.00009	7	30
𝒯⊄_lower-extrimity	0.9650	0.1044	0.00008	9	60
𝒯⊄_lower-extrimity	0.9700	0.1090	0.00009	8	60
𝒯⊄_lower-extrimity	0.9725	0.1042	0.00008	9	60
𝒯⊄_lower-extrimity	0.9663	0.1062	0.00008	8	60
𝒯⊄_lower-extrimity	0.9750	0.0986	0.00008	8	60
𝒯⊄_lung	0.9787	0.1008	0.00009	10	60
𝒯⊄_lung	0.9775	0.0948	0.00007	10	60
𝒯⊄_lung	0.9737	0.1007	0.00007	8	60
𝒯⊄_lung	0.9688	0.1038	0.00008	9	60
𝒯⊄_lung	0.9775	0.1006	0.00008	6	60
𝒯⊄_lower-extrimity	0.9750	0.1006	0.00009	8	80
𝒯⊄_lower-extrimity	0.9787	0.0975	0.00009	7	80
𝒯⊄_lower-extrimity	0.9775	0.0917	0.00008	7	80
𝒯⊄_lower-extrimity	0.9750	0.0998	0.00007	8	80
𝒯⊄_lower-extrimity	0.9712	0.1033	0.00009	6	80
𝒯⊄_lung	0.9762	0.0954	0.00008	8	80
𝒯⊄_lung	0.9700	0.1056	0.00007	6	80
𝒯⊄_lung	0.9725	0.1018	0.00009	5	80
𝒯⊄_lung	0.9737	0.1031	0.00007	7	80
𝒯⊄_lung	0.9750	0.1107	0.00007	8	80
